# Supplementary material for: Comparing calculated microphysical properties of tropical convective clouds at cloud base with measurements during the ACRIDICON-CHUVA campaign
Source: Copernicus journal article supplement (doi:10.5194/acp-2016-872), 2016-12-16
Supplement: Supplementary file [file acp-2016-872-AC1-supplement.pdf]

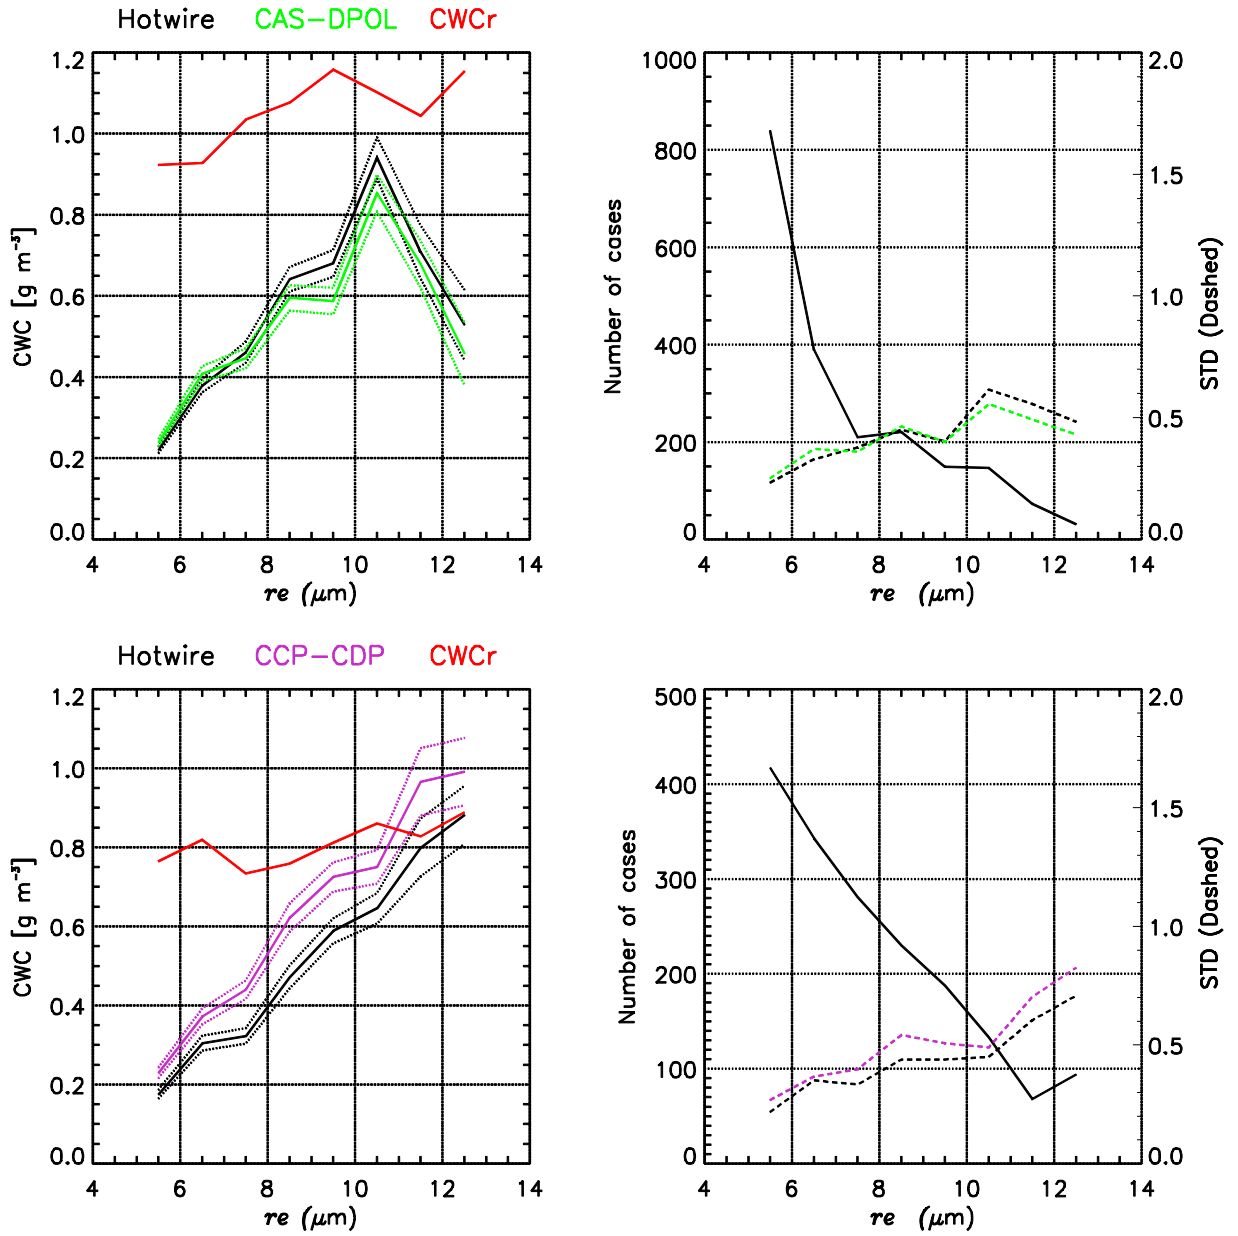

Figure 4. Mean cloud water content from the hot-wire measurements and estimated from the cloud probes (CCP-CDP and CAS-DPOL from top to bottom, respectively) as a function of effective radius ( $r_e$ ) size (left panel). The ratios between the hot-wire liquid water content and the cloud water content derived from each probe are shown in red ( $CWC_r$ ). The total uncertainty for each probe and the hot-wire measurements are shown by the dotted lines. The number of cases (black continuous line), hot-wire measurement standard deviations (dashed black line), and probe CWC standard deviations (dashed colored line) for each  $r_e$  size are shown in the right panels.

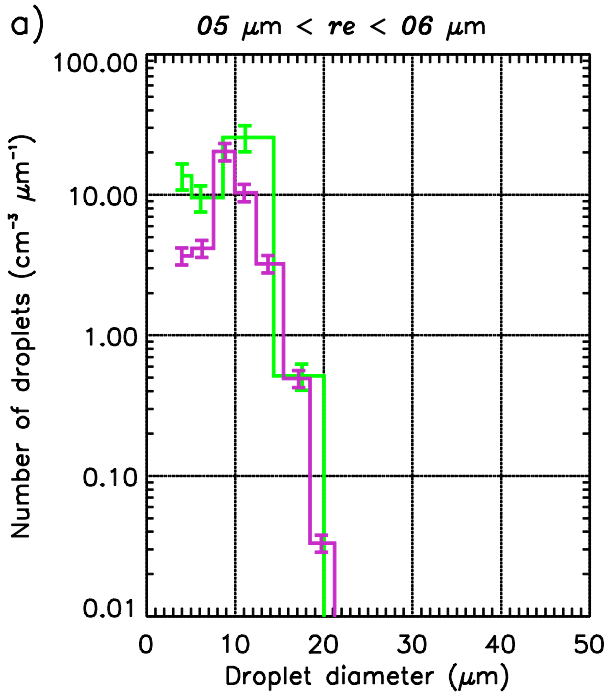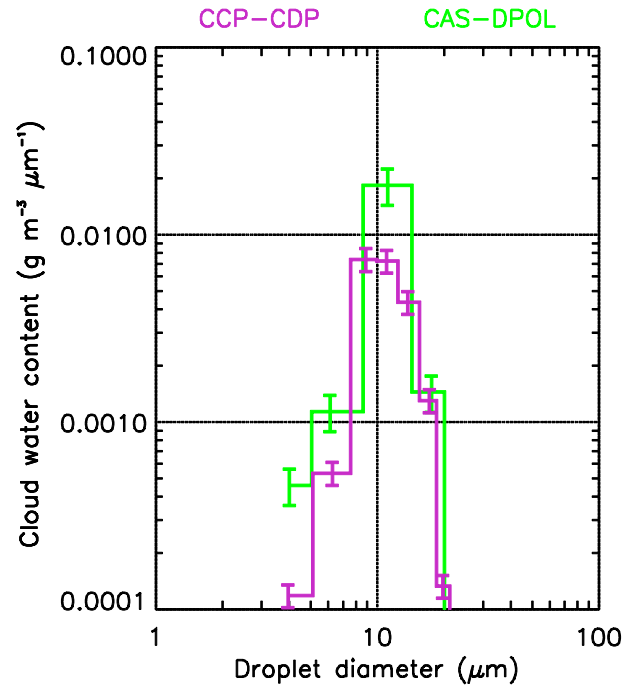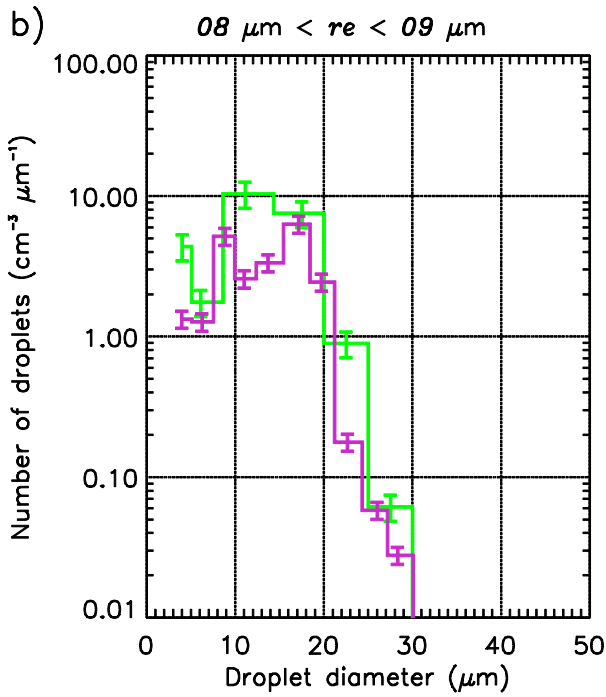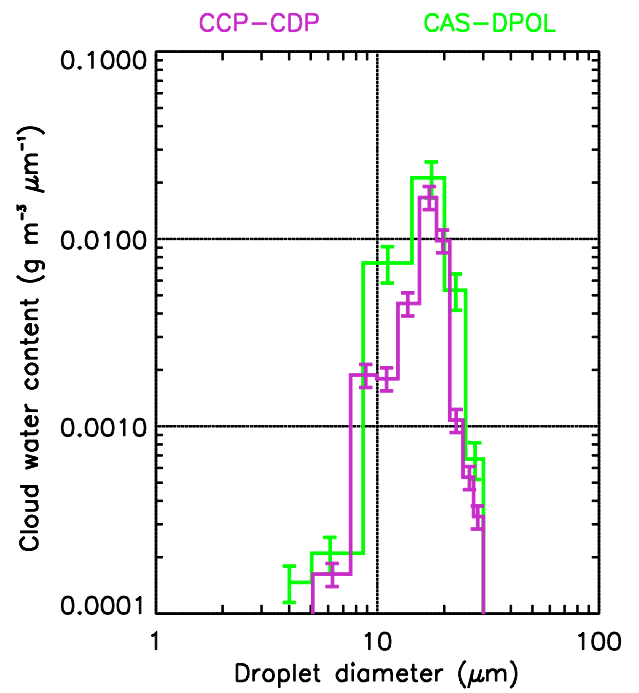

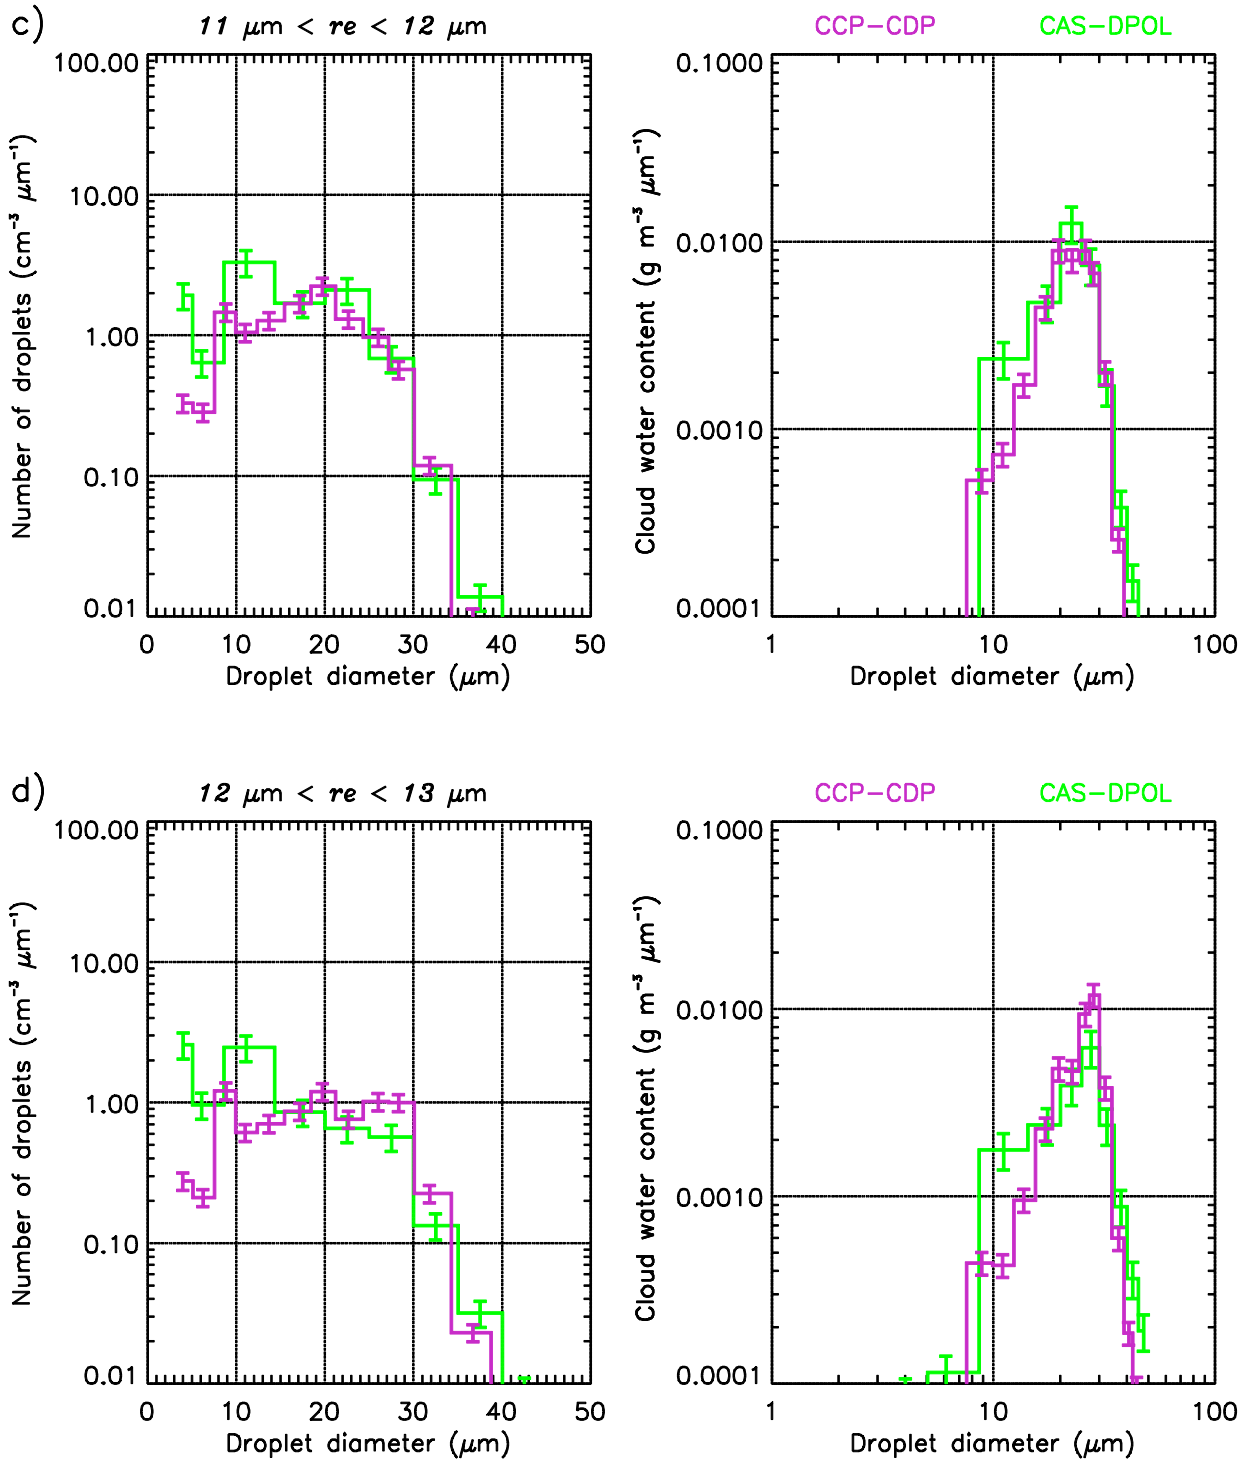

Figure 6. (left) Mean cloud droplet concentration (solid lines) and (right) cloud water content as a function of droplet diameter in the left and right panels, respectively, for a)  $5 \mu\text{m} < r_e < 6 \mu\text{m}$ ; b)  $8 \mu\text{m} < r_e < 9 \mu\text{m}$ ; c)  $11 \mu\text{m} < r_e < 12 \mu\text{m}$ ; d)  $12 \mu\text{m} < r_e < 13 \mu\text{m}$ . The probes are identified by colors as shown at the top of the panels. The error bars indicate the uncertainty range of mean cloud droplet concentration and cloud water content values as a function of droplet diameter.
