# Supplementary material for: Comparing calculated microphysical properties of tropical convective clouds at cloud base with measurements during the ACRIDICON-CHUVA campaign
Source: Copernicus journal article supplement (doi:10.5194/acp-2016-872), 2016-12-16
Supplement: Supplementary file [file acp-2016-872-AC2-supplement.pdf]

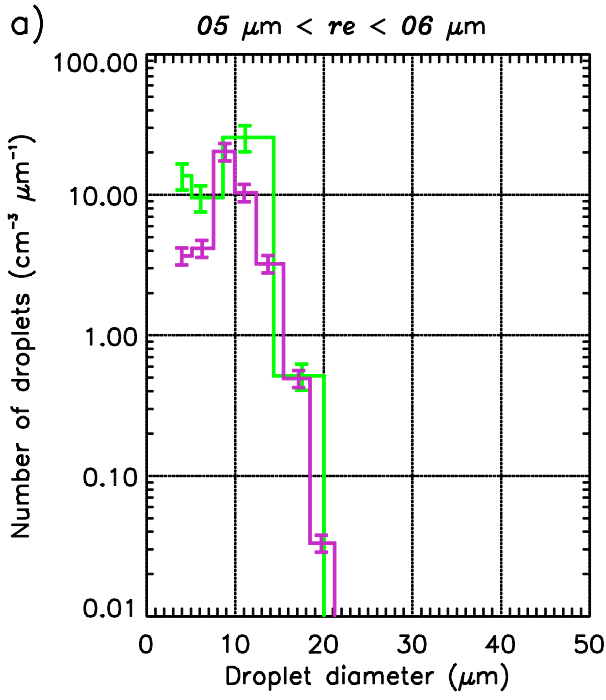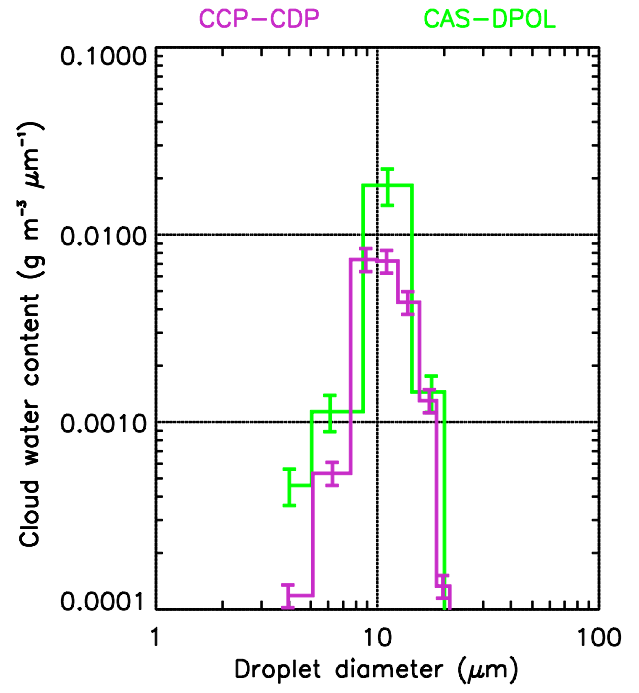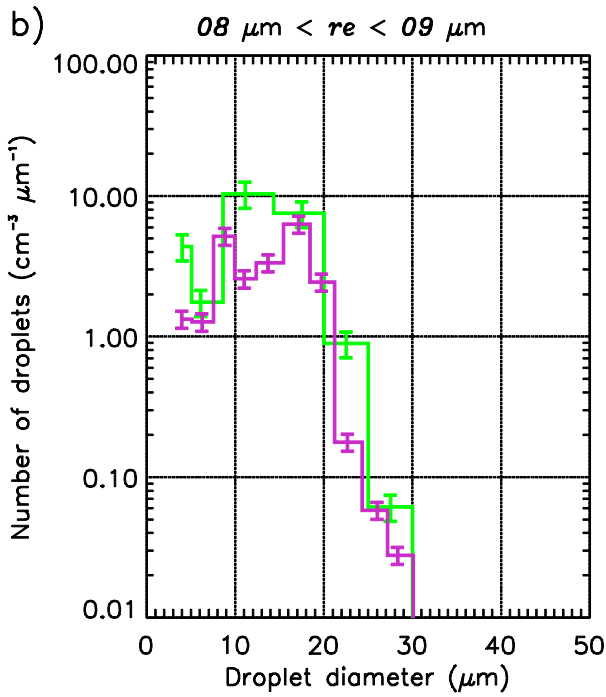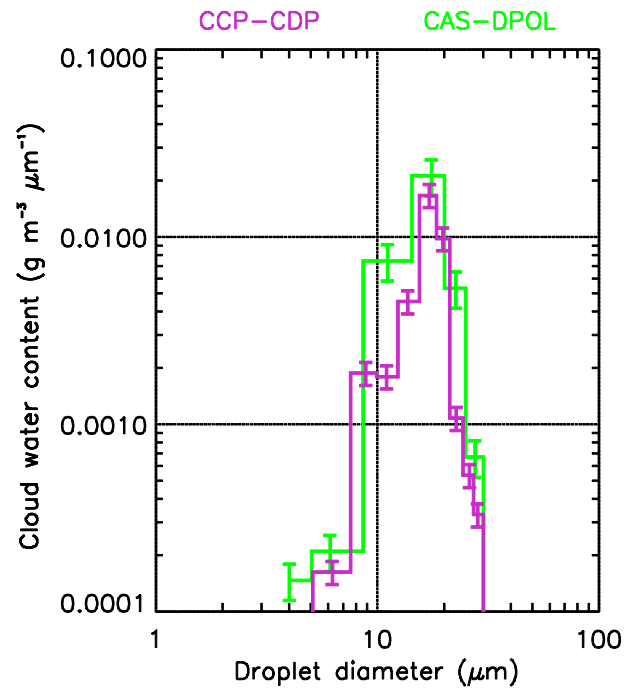

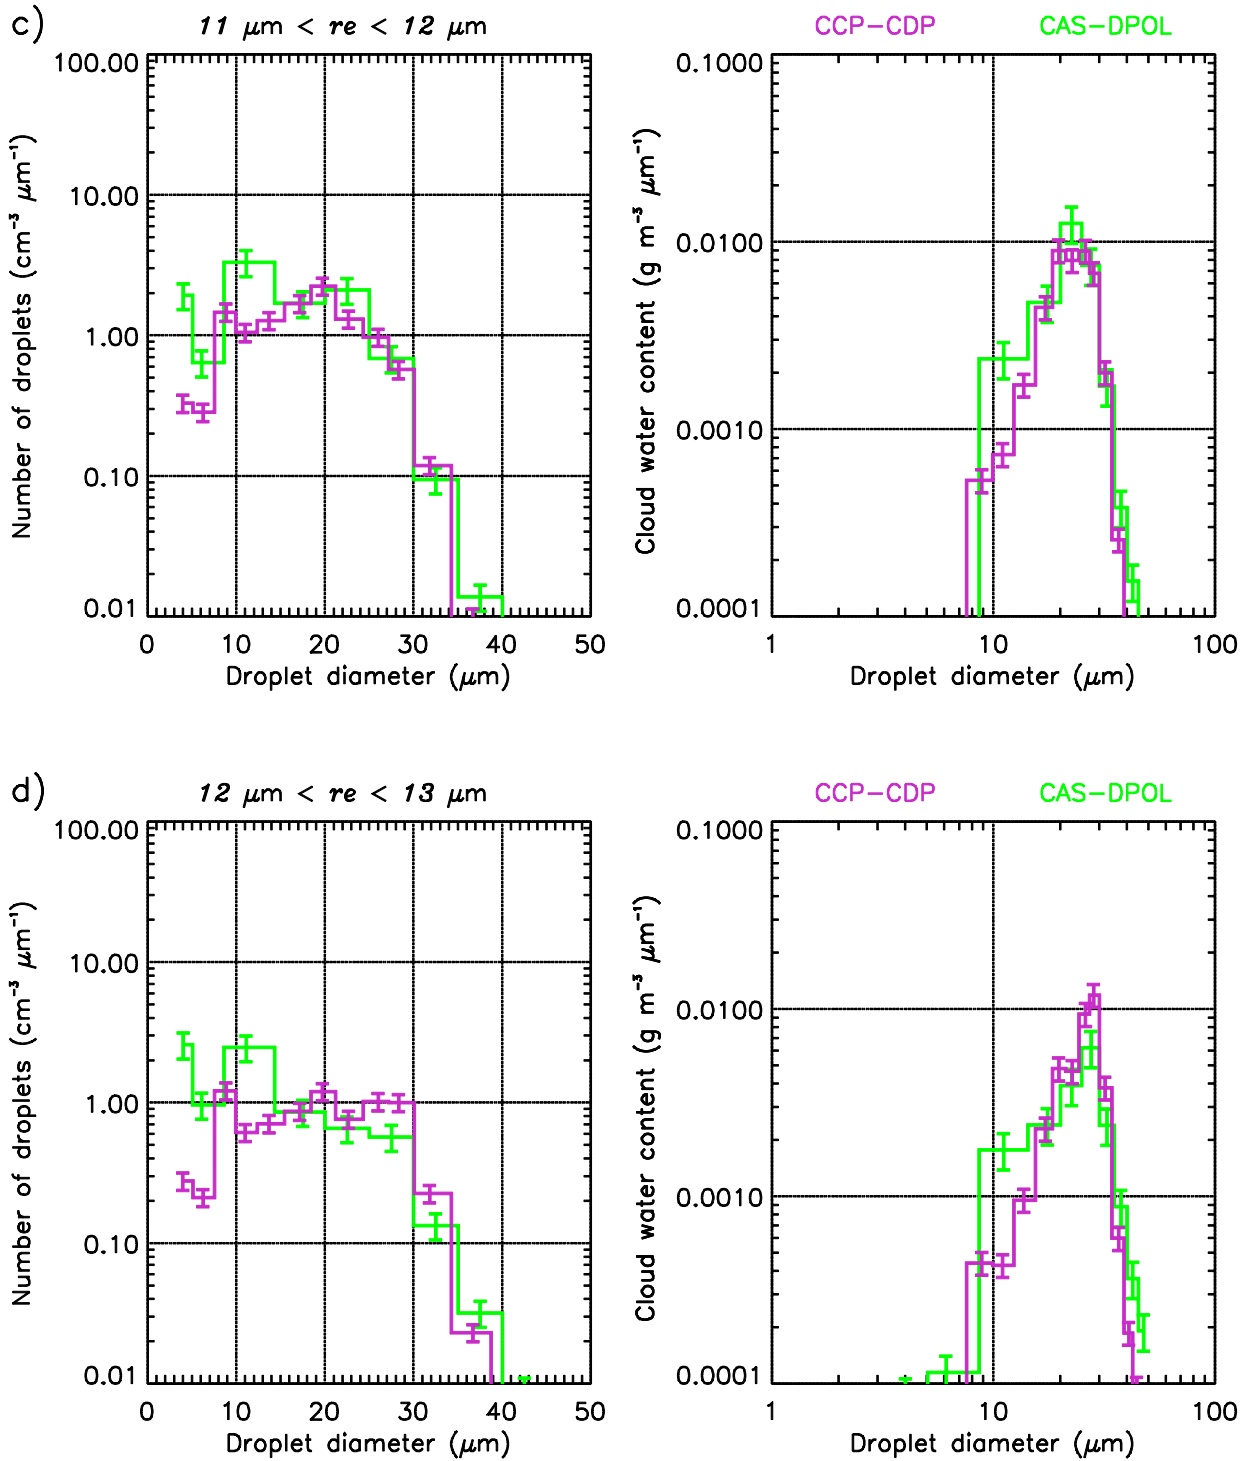

Figure 6. (left) Mean cloud droplet concentration (solid lines) and (right) cloud water content as a function of droplet diameter in the left and right panels, respectively, for a)  $5 \mu\text{m} < r_e < 6 \mu\text{m}$ ; b)  $8 \mu\text{m} < r_e < 9 \mu\text{m}$ ; c)  $11 \mu\text{m} < r_e < 12 \mu\text{m}$ ; d)  $12 \mu\text{m} < r_e < 13 \mu\text{m}$ . The probes are identified by colors as shown at the top of the panels. The error bars indicate the uncertainty range of mean cloud droplet concentration and cloud water content values as a function of droplet diameter.
