# Supplementary material for: Comparing calculated microphysical properties of tropical convective clouds at cloud base with measurements during the ACRIDICON-CHUVA campaign
Source: Copernicus journal article supplement (doi:10.5194/acp-2016-872), 2016-12-16
Supplement: Supplementary file [file acp-2016-872-AC3-supplement.pdf]

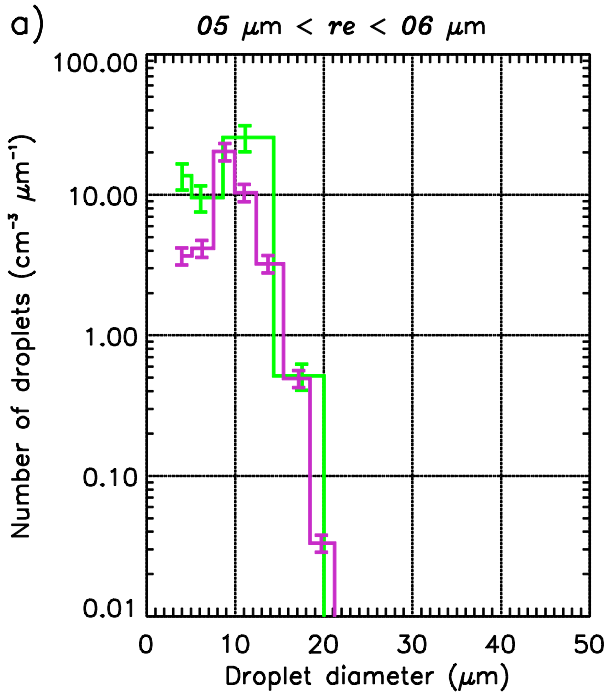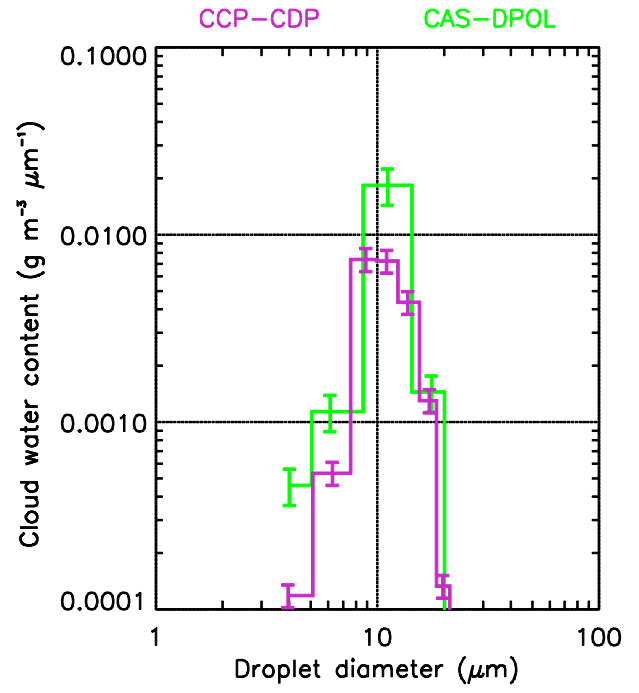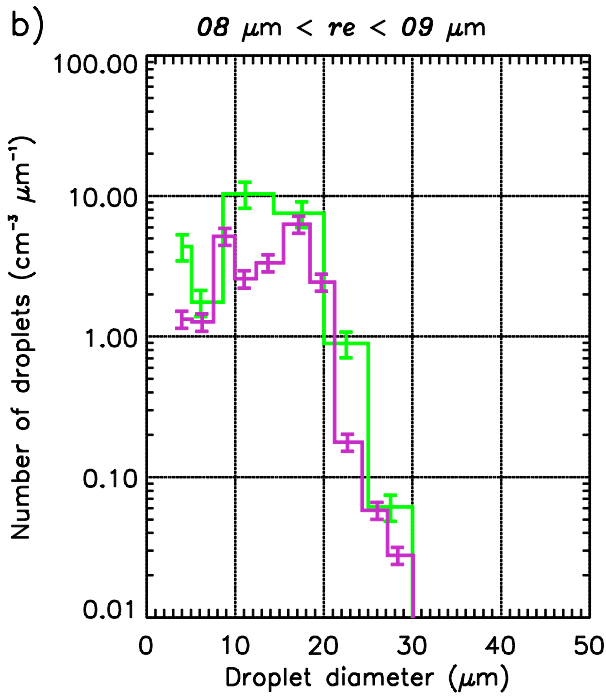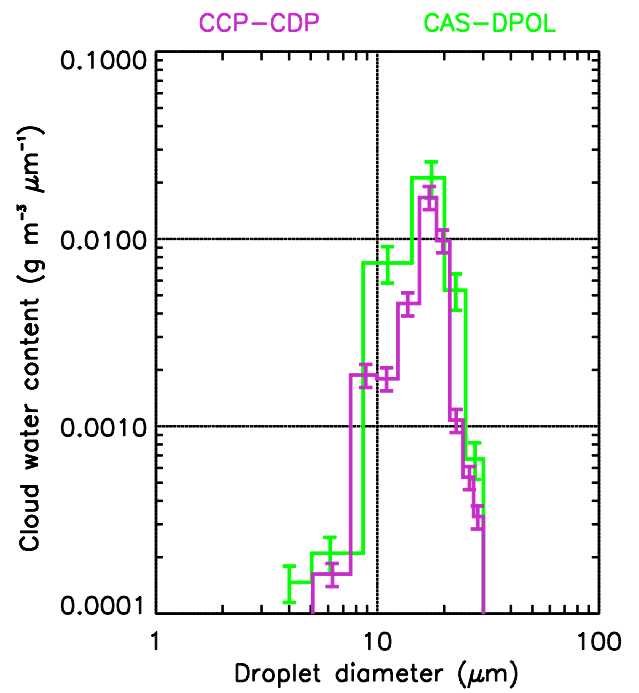

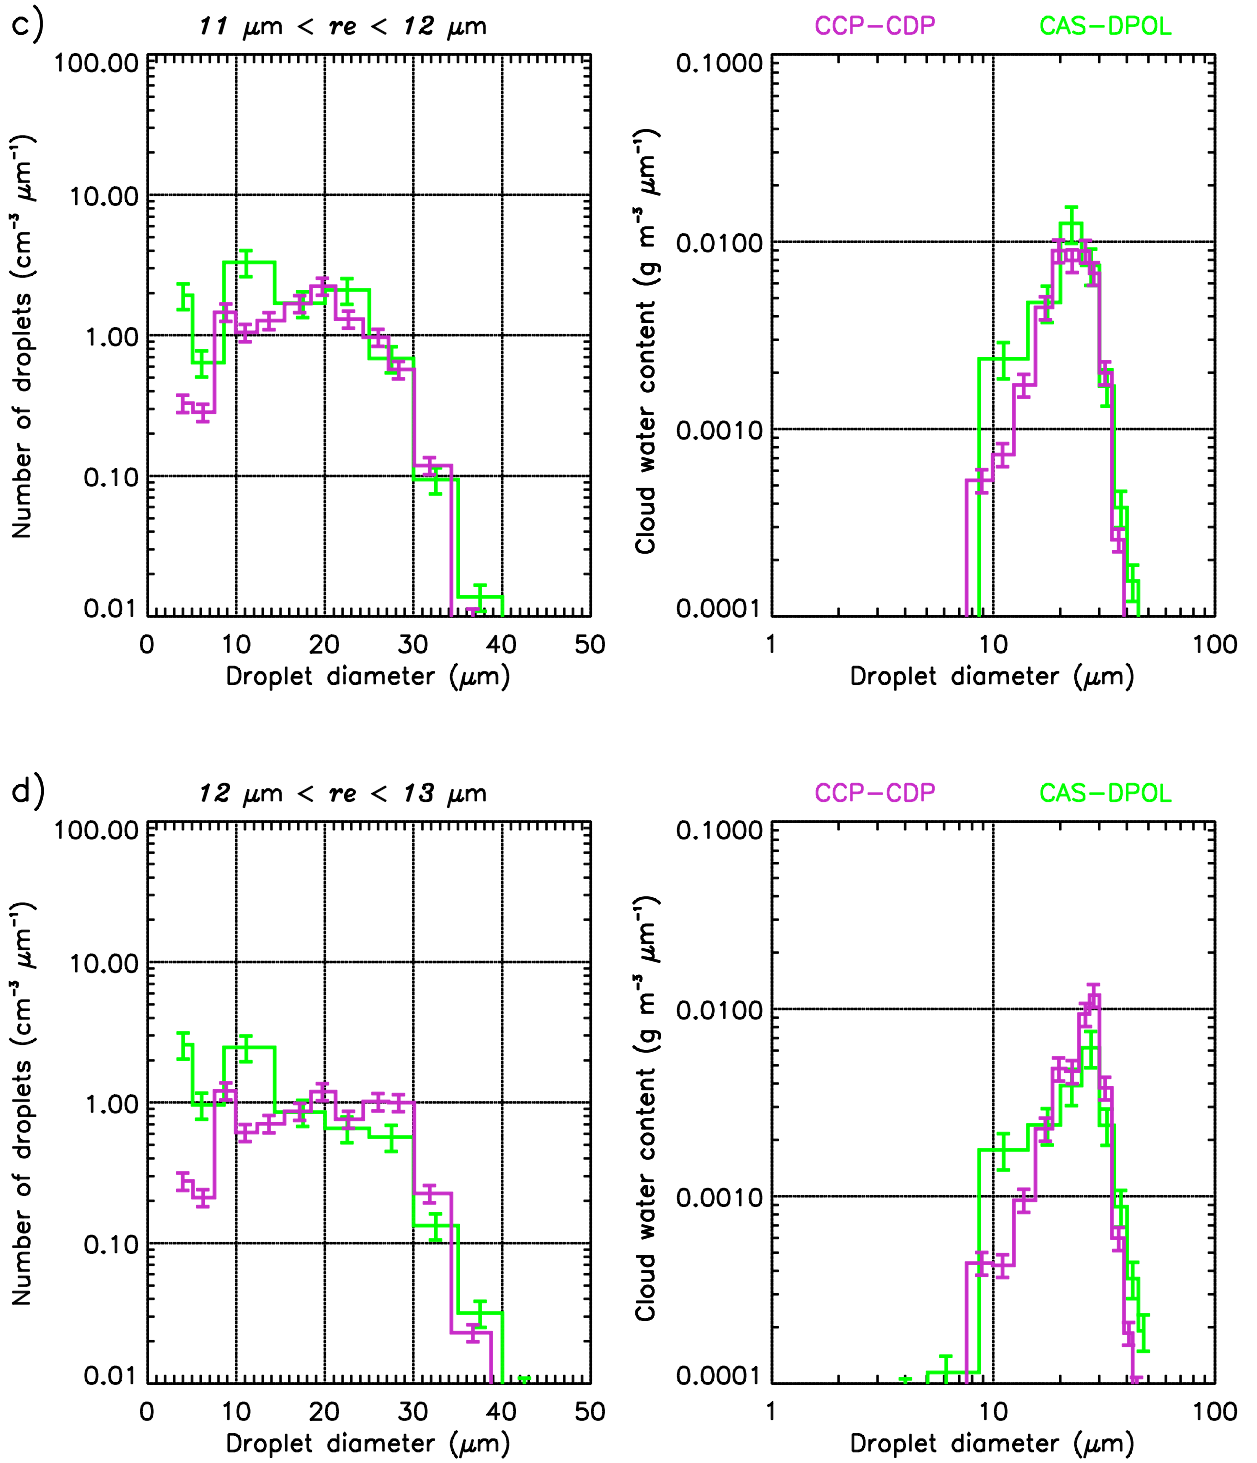

Figure 6. (left) Mean cloud droplet concentration (solid lines) and (right) cloud water content as a function of droplet diameter in the left and right panels, respectively, for a)  $5 \mu\text{m} < r_e < 6 \mu\text{m}$ ; b)  $8 \mu\text{m} < r_e < 9 \mu\text{m}$ ; c)  $11 \mu\text{m} < r_e < 12 \mu\text{m}$ ; d)  $12 \mu\text{m} < r_e < 13 \mu\text{m}$ . The probes are identified by colors as shown at the top of the panels. The error bars indicate the uncertainty range of mean cloud droplet concentration and cloud water content values as a function of droplet diameter.

a) FLIGHT AC11 TIME: 17:52(56 s) CCN=2927.4 · S<sup>1.137</sup>

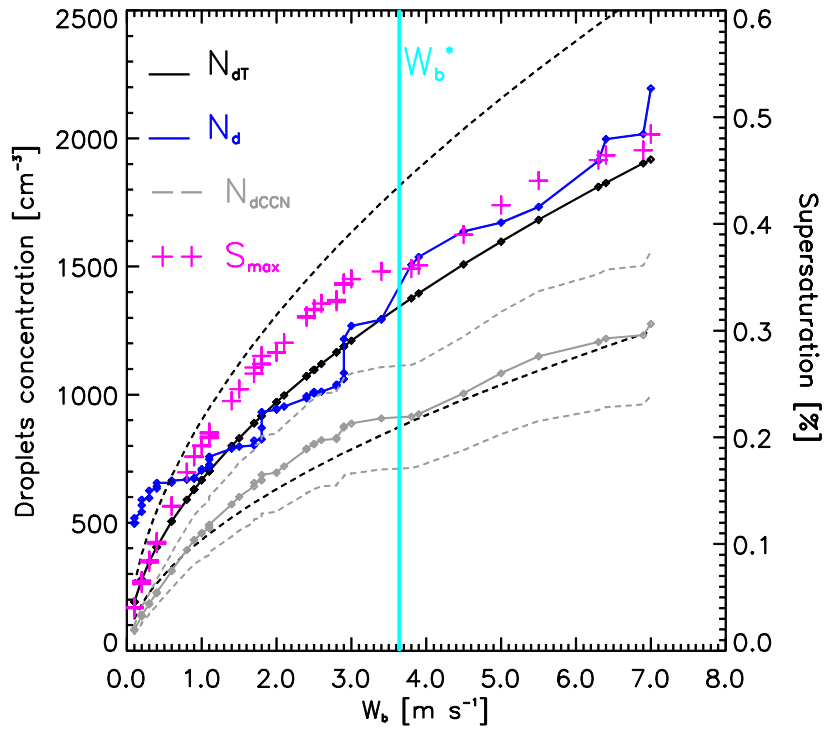

b) FLIGHT AC13 TIME: 16:50(72 s) CCN=4145.4 · S<sup>0.922</sup>

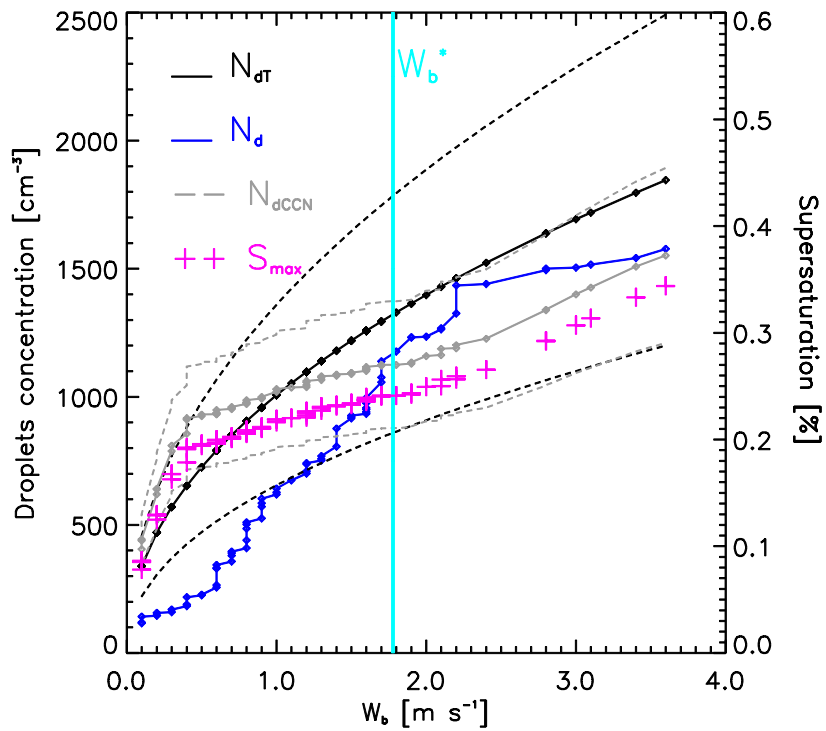

c) FLIGHT AC14 TIME: 15:06(184 s) CCN=1509.7 · S<sup>0.973</sup>

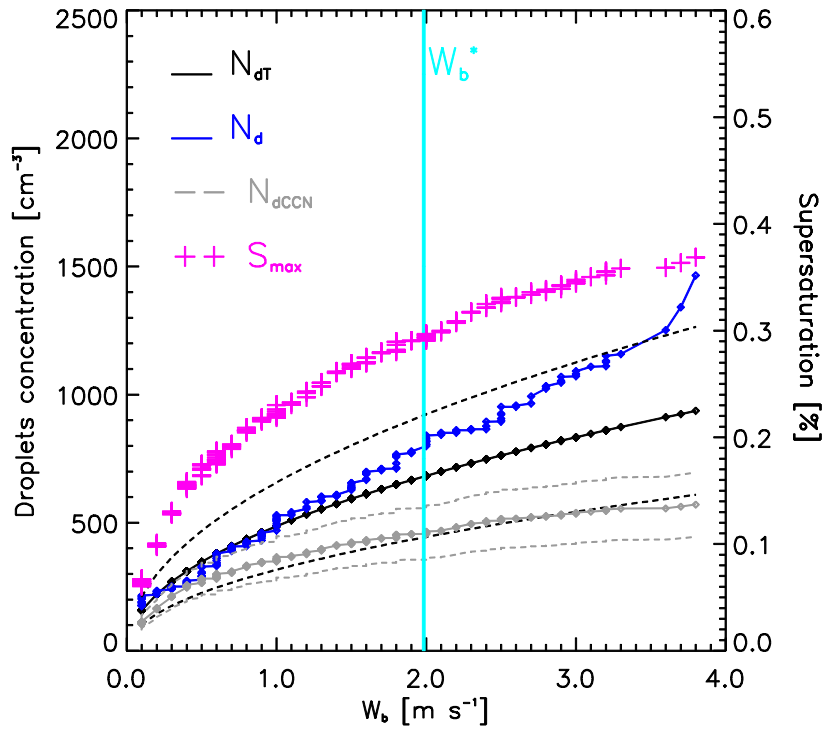

d) FLIGHT AC16 TIME: 20:10(58 s) CCN=1966.2 · S<sup>0.672</sup>

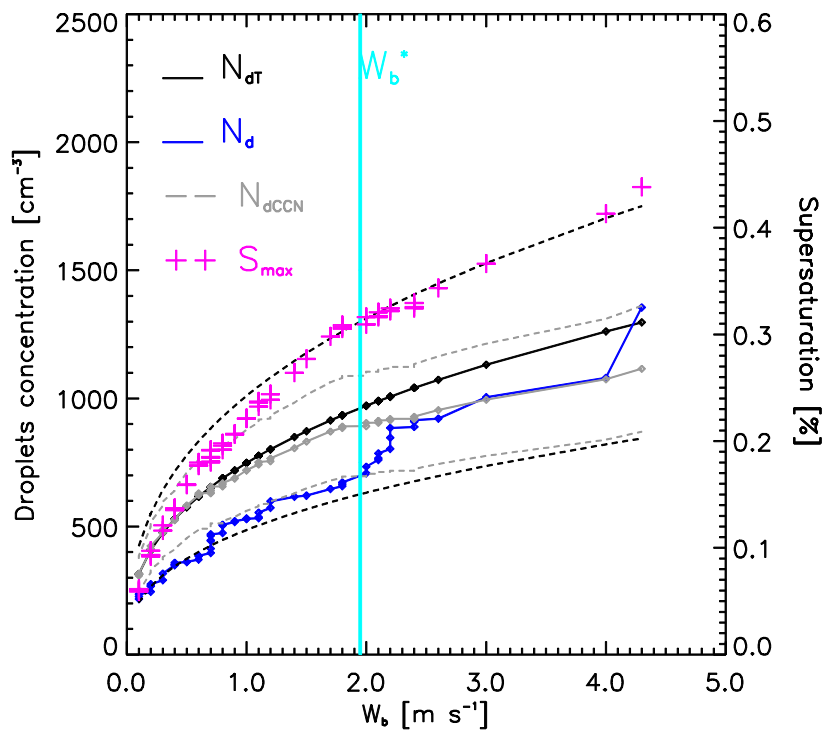

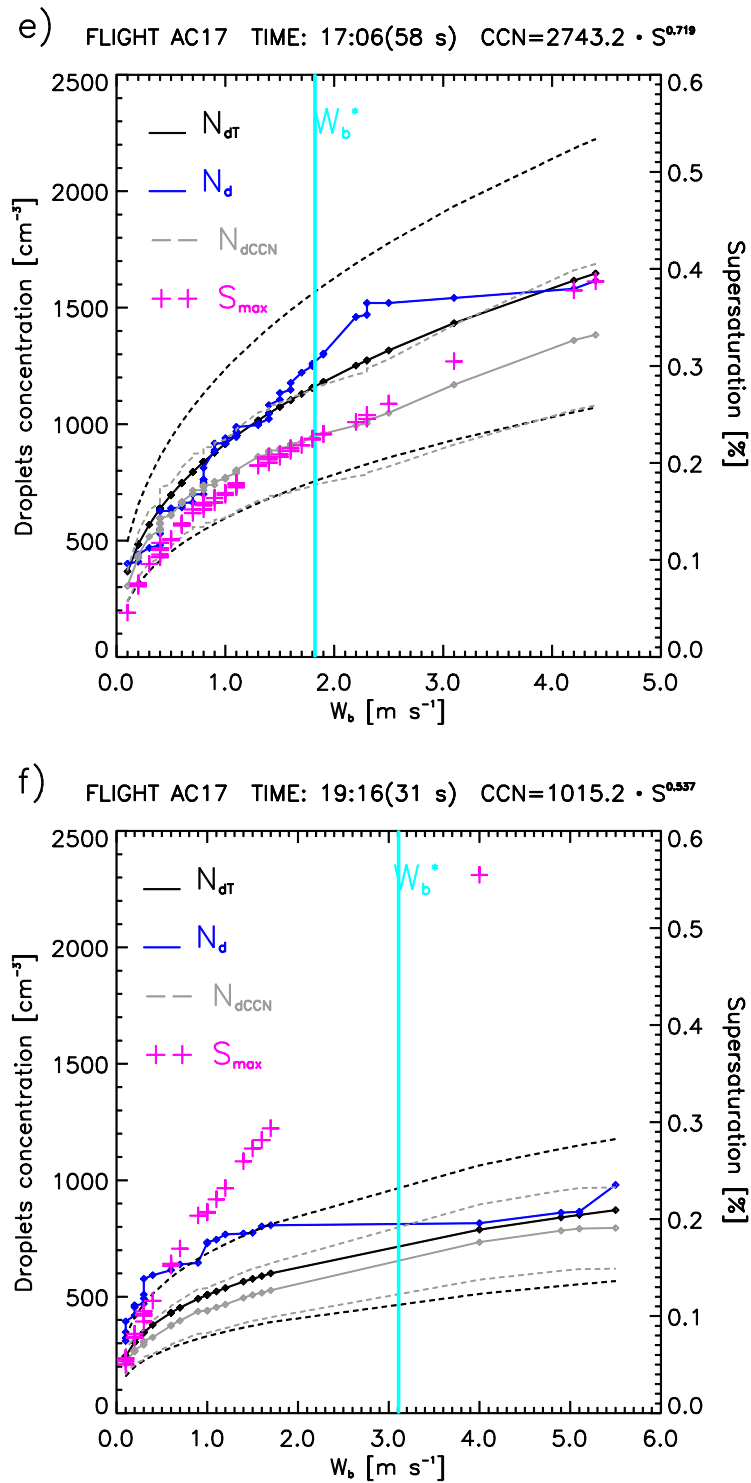

Figure 11a-f.  $N_{dCCN}$ ,  $S$ ,  $N_{dT}$  and  $N_d$  values are presented as a function of the cloud base updrafts ( $W_b$ ). This plot is based on the ‘probability matching method’ (PMM), using same percentiles for  $W_b$  and  $N_d$  ( $N_{dCCN}$  or  $N_{dT}$ ). The values of  $N_{dCCN}$ ,  $N_{dT}$  and  $N_d$  are shown the left y-axis, those of  $S$  on the right y-axis. The black dashed lines are the  $N_{dT}$  uncertainties. The gray solid (dashed) lines are the  $N_{dCCN}$  values (uncertainties). The effective updraft  $W_b^*$  for each flight segment is shown by the cyan line. The data are based on the CAS-DPOL probe. The time, period of measurements (sample size in seconds), and  $N_{CCN}(S)$  equation are shown on the top of the figures.
